# Supplementary material
Source: PubMed Central journal article supplement (PMC4273405)
Supplement: pnas.201419083SI.pdf [file pnas.201419083SI.pdf]

# Supporting Information

Merlo et al. 10.1073/pnas.1419083111

## SI Text

### Genotypes.

**Fig. 1.** ctr: *elav-GAL4/+*; *p53* null; *p53<sup>11-1B-1</sup>*. tau: *elav-GAL4/+*; *UAS-tau<sup>R406W</sup>/+*; tau + *p53* null: *elav-GAL4/+*; *UAS-tau<sup>R406W</sup>*, *p53<sup>11-1B-1</sup>/p53<sup>11-1B-1</sup>*.

**Fig. 4.** tau: *elav-GAL4/+*; *UAS-tau<sup>R406W</sup>/+*. Clc-LOF: *elav-GAL4/+*; *Clc<sup>DG23206</sup>/+* or *elav-GAL4/+*; *UAS-tau<sup>R406W</sup>/Clc<sup>DG23206</sup>*. Chc-1: (*elav-GAL4/Chc<sup>1</sup>* or *elav-GAL4/Chc<sup>1</sup>*; *UAS-tau<sup>R406W</sup>/+*. Chc-4: *elav-GAL4/Chc<sup>4</sup>* or *elav-GAL4/Chc<sup>4</sup>*; *UAS-tau<sup>R406W</sup>/+*. Rab26-OE: *elav-GAL4/+*; *UAS-Rab26/+* or *elav-GAL4/+*; *UAS-Rab26/+*; *UAS-tau<sup>R406W</sup>/+*. *UAS-Rab26-DN*: *elav-GAL4/+*; *UAS-Rab26<sup>T204N</sup>/+* or *elav-GAL4/+*; *UAS-tau<sup>R406W</sup>/UAS-Rab26<sup>T204N</sup>*. Rab26 RNAi: *elav-GAL4/+*; *UAS-Rab26 RNAi 43730/+* or *elav-GAL4/+*; *UAS-Rab26 RNAi 43730/+*; *UAS-tau<sup>R406W</sup>/+*. Sytβ-LOF: *elav-GAL4/+*; *Sytβ<sup>DG10711</sup>/+* or *elav-GAL4/+*; *UAS-tau<sup>R406W</sup>/Sytβ<sup>DG10711</sup>*. Sytβ RNAi: *elav-GAL4/+*; *UAS-Sytβ RNAi JF02593* or *elav-GAL4/+*; *UAS-tau<sup>R406W</sup>/UAS-Sytβ RNAi JF02593*. Amph-LOF: *elav-GAL4/+*; *Amph<sup>EY9339</sup>/+* or *elav-GAL4/+*; *Amph<sup>EY9339</sup>/+*; *UAS-tau<sup>R406W</sup>/+*. Amph RNAi: *elav-GAL4/+*; *UAS-Amph RNAi 7190/+* or *elav-GAL4/+*; *UAS-tau<sup>R406W</sup>/UAS-Amph RNAi 7190*.

**Fig. S1.** ctr: *elav-GAL4/+*. tau: *elav-GAL4/+*; *UAS-tau<sup>R406W</sup>/+*. tau + *p53<sup>11-1B-1</sup>*: *elav-GAL4/+*; *UAS-tau<sup>R406W</sup>*, *p53<sup>11-1B-1</sup>/p53<sup>11-1B-1</sup>*. *p53<sup>5A-1-4</sup>*: *p53<sup>5A-1-4</sup>*. tau + *p53<sup>5A-1-4</sup>*: *elav-GAL4/+*; *UAS-tau<sup>R406W</sup>*, *p53<sup>5A-1-4</sup>/p53<sup>5A-1-4</sup>*.

**Fig. S7.** ctr – SCA3: *elav-GAL4/+*. ctr + SCA3: *elav-GAL4/+*; *UAS-ATXN3-Q78/+*. EGFP + SCA3: *elav-GAL4/+*; *UAS-EGFP/+*; *UAS-ATXN3-Q78/+*. Amph-LOF + SCA3: *elav-GAL4/+*; *Amph<sup>EY9339</sup>/+*; *UAS-ATXN3-Q78/+*. Chc-LOF + SCA3: *elav-GAL4/Chc<sup>1</sup>*; *UAS-ATXN3-Q78/+*. Clc-LOF + SCA3: *elav-GAL4/+*; *UAS-Clc<sup>DG23206</sup>/UAS-ATXN3-Q78*. Sytβ RNAi + SCA3: *elav-GAL4/+*; *UAS-Sytβ RNAi JF02593/UAS-ATXN3-Q78*. Rab26-OE + SCA3: *elav-GAL4/+*; *UAS-Rab26/+*; *UAS-ATXN3-Q78/+*. Rab26-DN + SCA3: *elav-GAL4/+*; *UAS-ATXN3-Q78/UAS-Rab26<sup>T204N</sup>*.

**Fig. S8.** ctr: *elav-GAL4/+*. *p53* null: *p53<sup>11-1B-1</sup>*. tau: *elav-GAL4/+*; *UAS-tau<sup>R406W</sup>/+*. tau + *p53* null: *elav-GAL4/+*; *UAS-tau<sup>R406W</sup>*, *p53<sup>11-1B-1</sup>/p53<sup>11-1B-1</sup>*.

GFP-Atg8a: *elav-GAL4/+*; *UAS-GFP-Atg8a/+*. Tau + Atg8a: *elav-GAL4/+*; *UAS-tau<sup>R406W</sup>/UAS-GFP-Atg8a*. GFP-ref(2)P: *elav-GAL4/+*; *UAS-GFP-ref(2)P/+*. Tau + ref(2)P: *elav-GAL4/+*; *UAS-tau<sup>R406W</sup>/UAS-GFP-ref(2)P*.

### Primers.

#### ChIP primers for Drosophila *p53* gene.

dp53 ChIP For 5'-CGCTTGTACTTGCATCATTTCG-3';

dp53 ChIP Rev 5'-GCGCCTTGGCTGGATAAAC-3';

3' UTR ChIP For 5'-GTGGCAGCCGGTTCGAA-3';

3' UTR ChIP Rev 5'-CAGCCAAAGCGGATGCA-3'.

#### ChIP primers for Drosophila *rpr* gene.

rpr ChIP For 5'-CGGAAAAGTATGATATGGCGATAAG-3';

rpr ChIP Rev 5'-CGGTCCCTCAGTCTCCAAGTC-3'.

#### ChIP primers for validation of candidates in Drosophila.

Amph ChIP For 5'-ATGTTTCAGCCACACAAGTACACGT-3';

Amph ChIP Rev 5'-ATGTACATTAACAAGGTTCCGC-3';

Clc ChIP For 5'-TCTGCTGCCAGTGAAAAACG-3';

Clc ChIP Rev 5'-CAAGTTCACCGTGGCATCAT-3';

Chc #1 ChIP For 5'-AGAAAAGAGGCAGCATTATCATCA-3';

Chc #1 ChIP Rev 5'-CGCAACTAACATGGCTGACT-3';

Chc #2 ChIP For 5'-GCTGGATTGTCCGAATTTGAC-3';

Chc #2 ChIP Rev 5'-GCAGGAATGCGGCAGACT-3';

Rab26 #1 ChIP For 5'-GGTGCAGAGTTACCGTGCTACA-3';

Rab26 #1 ChIP Rev 5'-GGTGTGCGACACGGCTACTT-3';

Rab26 #2 ChIP For 5'-CACGACGATGCTATCATGGC-3';

Rab26 #2 ChIP Rev 5'-ACGATAGCCAGGATATCCGGT-3';

Sytβ ChIP For 5'-CCTCGCTGGGCATGTGAT-3';

Sytβ ChIP Rev 5'-CCTTTGTGCCAAATTTAATTGTCA-3'.

#### ChIP primers for human BIN1.

hBIN1 prom For 5'-AGGGAATGGCCTGTGTGAAC-3';

hBIN1 prom Rev 5'-GAGAAATCGAGTCCAGGAATG-3';

hBIN1 intron1 For 5'-GCACCCGGTCAGTTGTCTATC-3';

hBIN1 intron1 Rev 5'-GCAGCTGGCGTGATCCA-3'.

**Solutions.** RIPA buffer was composed of 10 mM Tris-Cl (pH 8.0), 1 mM EDTA, 0.5 mM EGTA, 1% Triton X-100, 0.1% sodium deoxycholate, 0.1% SDS, and 140 mM NaCl. NEEM buffer was made up of 10 mM Hepes pH 7.6, 1.5 mM MgCl<sub>2</sub>, 0.1 mM EDTA, 10 mM KCl, and 300 mM sucrose. NEB buffer was made up of 0.32 M sucrose, 5 mM CaCl<sub>2</sub>, 3 mM Mg(Ac)<sub>2</sub>, 0.1 mM EDTA, and 10 mM Tris-HCl (pH 8).

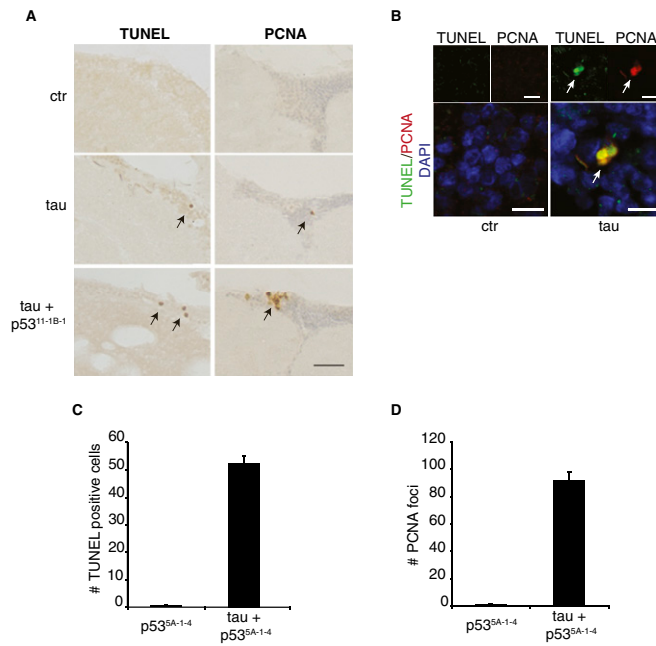

**Fig. S1.** p53 is neuroprotective in a *Drosophila* tauopathy model. (A) Loss of p53 ( $p53^{11-1B-1}$ ) in the brain increases tau-induced cell death, as indicated by TUNEL staining (Left) and cell-cycle activation and as monitored with PCNA expression (Right), arrows. (Scale bar: 20  $\mu\text{m}$ .) (B) Colabeling of PCNA, TUNEL-positive neurons in tau-transgenic flies, arrows. (Scale bars: 5  $\mu\text{m}$ .) (C) Apoptosis, indicated by the number of TUNEL-positive neurons, increases in the brains of tau-transgenic,  $p53^{5A-1-4}$  animals. (D) Cell-cycle reactivation, indicated by the number of PCNA-positive foci, increases in the brains of tau-transgenic,  $p53^{5A-1-4}$  animals. Flies are 10-d-old ( $n \geq 6$  per genotype). In the graph, values represent mean  $\pm$  SEM. ctr, control: *elav-GAL4/+*.

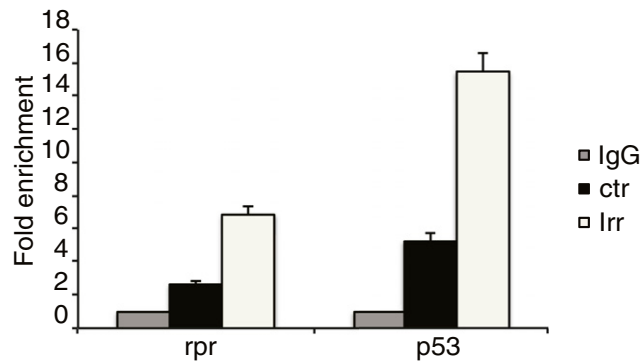

**Fig. S2.** p53 antibody specifically immunoprecipitates p53 protein. ChIP assay showing that p53 binds regulatory regions of the *p53* and *rpr* genes. Fold enrichment is expressed relative to IgG control. Values have been normalized to the total DNA and represent mean  $\pm$  SEM. The graph is representative of one of three independent triplicate assays. Chromatin for IP was taken from untreated (ctr) or irradiated (Irr)  $w^{1118}$  embryos.







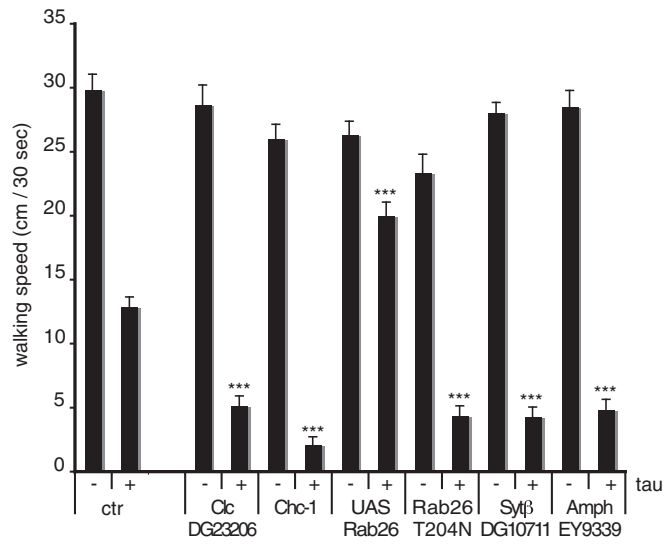

**Fig. S6.** Altering the function of synaptic genes in tau-transgenic animals modifies locomotion, measured as walking speed. Flies are 2-d-old ( $n = 18$  flies per genotype). In the graph, values represent mean  $\pm$  SEM. Asterisks indicate significant differences compared with tau-transgenic flies by ANOVA with Student–Newman–Keuls post hoc test for multiple comparisons. \*\*\* $P < 0.001$ . ctr, control: *elav-GAL4/+*.

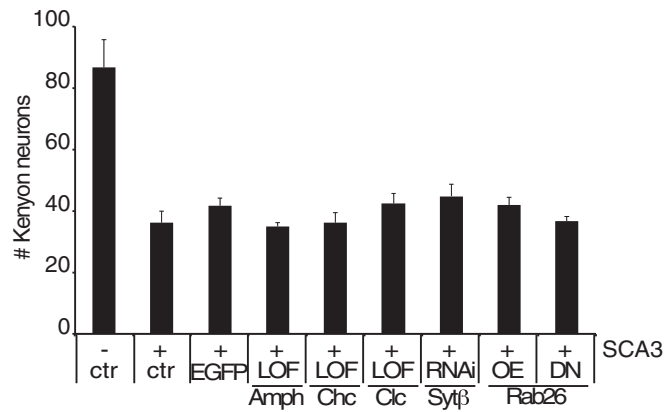

**Fig. S7.** Synaptic function modifiers do not alter neuronal toxicity of mutant ataxin 3. The number of Kenyon neurons per  $250 \mu\text{m}^2$  was counted. Flies are 10-d-old ( $n = 6$  flies per genotype). In the graph, values represent mean  $\pm$  SEM. ctr, control: *elav-GAL4/+*; SCA3, mutant ataxin 3: *UAS-ATXN3-Q78*.

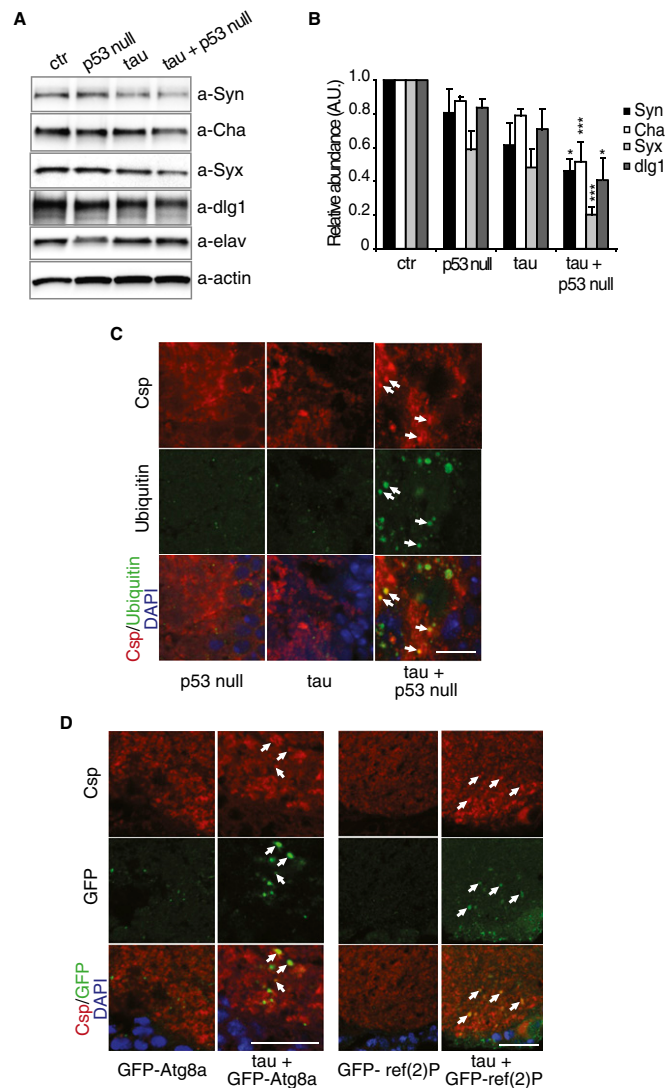

**Fig. S8.** Synaptic abnormalities in tau-transgenic animals. (A) There is a significant reduction in the expression of synaptic markers in the brains of tau-transgenic, p53-null flies. (B) Quantification of the protein expression reduction relative to control. In the graph, values represent mean  $\pm$  SEM of at least three Western blots per antibody. Asterisks indicate significant differences compared with control flies by ANOVA with Bonferroni post hoc test for multiple comparisons. \* $P < 0.05$ ; \*\*\* $P < 0.001$ . ctr, control: *elav-GAL4/+*. (C) Ubiquitin accumulates at synapses when tau is expressed in the absence of p53. (D) Autophagy markers accumulate at synapses in tau-transgenic flies. Flies are 10-d-old. (Scale bars: 10  $\mu$ m.) Syn, Synapsin; Cha, Choline acetyltransferase; Syx, syntaxin; dlg1, discs large 1; Elav, embryonic lethal abnormal vision; Csp, Cysteine string protein; Atg8a, Autophagy-specific gene 8a, detected with a transgenic reporter (*UAS-GFP-Atg8a*) and anti-GFP immunofluorescence; ref(2)P, refractory to sigma P, also known as p62 and SQSTM1, detected with a transgenic reporter (*UAS-GFP-ref(2)P*) and anti-GFP immunofluorescence.

#### Dataset S1. List of genes bound by p53 in tau-transgenic flies throughout the whole *Drosophila* genome

[Dataset S1](#)

#### Dataset S2. Gene Ontology analysis of the genes bound by p53 in tau-transgenic flies. To reduce the redundancy in gene set annotation, we used functional annotation clustering, which groups similar annotations together

[Dataset S2](#)

#### Dataset S3. Detailed list of the synaptic-transmission-related terms

[Dataset S3](#)
